# Supplementary material for: Structures of translationally inactive mammalian ribosomes
Source: eLife journal article supplement (doi:10.7554/elife.40486), 2018-10-24
Supplement: supp [file elife-40486-supp-v1.zip]

|        |       |        |   |               |              |                       |               |                |                   |  |
|--------|-------|--------|---|---------------|--------------|-----------------------|---------------|----------------|-------------------|--|
| SERBP1 | X4    | RABBIT | 1 | MPGHLQEGFGCVV | TNRFDQLFDDES | DPFEVLKAAENKKKEAGGGVG | GPGAKSAAQAAAQ | TNSNAAGKQLRKES | SQKDRKN           |  |
| SERBP1 | X1    | RABBIT | 1 | MPGHLQEGFGCVV | TNRFDQLFDDES | DPFEVLKAAENKKKEAGGGVG | GPGAKSAAQAAAQ | TNSNAAGKQLRKES | SQKDRKN           |  |
| SERBP1 | X2    | RABBIT | 1 | MPGHLQEGFGCVV | TNRFDQLFDDES | DPFEVLKAAENKKKEAGGGVG | GPGAKSAAQAAAQ | TNSNAAGKQLRKES | SQKDRKN           |  |
| SERBP1 | X3    | RABBIT | 1 | MPGHLQEGFGCVV | TNRFDQLFDDES | DPFEVLKAAENKKKEAGGGVG | GPGAKSAAQAAAQ | TNSNAAGKQLRKES | SQKDRKN           |  |
| STM1   | YEAST |        | 1 | -----         |              |                       |               |                | MSNPFDLLGNDVEDADV |  |

|        |       |        |    |                 |            |                    |                    |            |                   |
|--------|-------|--------|----|-----------------|------------|--------------------|--------------------|------------|-------------------|
| SERBP1 | X4    | RABBIT | 81 | PLPPNVGVVDKKEET | QPPVALKKEG | IIRRVGRRPDQQLQEGEK | IIDRRPERRPPRERRFEK | PLEEKGE    | GGEFSVDRPIIDR     |
| SERBP1 | X1    | RABBIT | 81 | PLPPNVGVVDKKEET | QPPVALKKEG | IIRRVGRRPDQQLQEGEK | IIDRRPERRPPRERRFEK | PLEEKGE    | GGEFSVDRPIIDR     |
| SERBP1 | X2    | RABBIT | 81 | PLPPNVGVVDKKEET | QPPVALKKEG | IIRRVGRRPDQQLQEGEK | IIDRRPERRPPRERRFEK | PLEEKGE    | GGEFSVDRPIIDR     |
| SERBP1 | X3    | RABBIT | 81 | PLPPNVGVVDKKEET | QPPVALKKEG | IIRRVGRRPDQQLQEGEK | IIDRRPERRPPRERRFEK | PLEEKGE    | GGEFSVDRPIIDR     |
| STM1   | YEAST |        | 19 | VL              | PPKEIVKSN  | TSSKKADV           | PPPSADPSKARKNR     | PRPSGNEGAT | RDKTAGRNNRSK----- |

|        |       |        |     |                         |                        |                         |                      |           |               |                   |
|--------|-------|--------|-----|-------------------------|------------------------|-------------------------|----------------------|-----------|---------------|-------------------|
| SERBP1 | X4    | RABBIT | 161 | PIRGRGGLGRGRGGRGRGMGRGD | GFDSRGKREFDRHSGSDR     | -----                   | SGLKHEDKRGSGSGSHNWGT | TVKDEL    | T-----        |                   |
| SERBP1 | X1    | RABBIT | 161 | PIRGRGGLGRGRGGRGRGMGRGD | GFDSRGKREFDRHSGSDRSSFS | SHYSGLKHEDKRGSGSGSHNWGT | TVKDEL               | TESPKYIQK |               |                   |
| SERBP1 | X2    | RABBIT | 161 | PIRGRGGLGRGRGGRGRGMGRGD | GFDSRGKREFDRHSGSDR     | -----                   | SGLKHEDKRGSGSGSHNWGT | TVKDEL    | TESPKYIQK     |                   |
| SERBP1 | X3    | RABBIT | 161 | PIRGRGGLGRGRGGRGRGMGRGD | GFDSRGKREFDRHSGSDRSSFS | SHYSGLKHEDKRGSGSGSHNWGT | TVKDEL               | T-----    |               |                   |
| STM1   | YEAST |        | 75  | -----                   |                        |                         |                      |           | DVTDSATTKKSNT | RRATDRHSRTGK----- |
|        |       |        |     |                         |                        |                         |                      |           | TDTKKKVN----- | QGWGDDKKELS-----  |

|        |       |        |     |       |  |  |  |  |                             |                             |
|--------|-------|--------|-----|-------|--|--|--|--|-----------------------------|-----------------------------|
| SERBP1 | X4    | RABBIT | 227 | ----- |  |  |  |  | DLQSNVTEETPEGEEHPVAD        | TENK-----                   |
| SERBP1 | X1    | RABBIT | 241 | ----- |  |  |  |  | QISYNCSDLQSNVTEETPEGEEHPVAD | TENK-----                   |
| SERBP1 | X2    | RABBIT | 235 | ----- |  |  |  |  | QISYNCSDLQSNVTEETPEGEEHPVAD | TENK-----                   |
| SERBP1 | X3    | RABBIT | 233 | ----- |  |  |  |  | DLQSNVTEETPEGEEHPVAD        | TENK-----                   |
| STM1   | YEAST |        | 119 | ----- |  |  |  |  | AEKEAQADAAAE                | IAEDAAEAEDAGKPKTAQLSLQDYLNQ |
|        |       |        |     |       |  |  |  |  | QANNQFNKVPEAKKV             |                             |

|        |       |        |     |               |                    |                  |          |                |                          |  |
|--------|-------|--------|-----|---------------|--------------------|------------------|----------|----------------|--------------------------|--|
| SERBP1 | X4    | RABBIT | 290 | NEGADGQWK---- | KGFLVHKSKSEEAHAEDS | VMDHHFRKPANDITSQ | LEI----- | NFGDLGRPG----- | RGG                      |  |
| SERBP1 | X1    | RABBIT | 311 | NEGADGQWK---- | KGFLVHKSKSEEAHAEDS | VMDHHFRKPANDITSQ | LEI----- | NFGDLGRPG----- | RGG                      |  |
| SERBP1 | X2    | RABBIT | 305 | NEGADGQWK---- | KGFLVHKSKSEEAHAEDS | VMDHHFRKPANDITSQ | LEI----- | NFGDLGRPG----- | RGG                      |  |
| SERBP1 | X3    | RABBIT | 296 | NEGADGQWK---- | KGFLVHKSKSEEAHAEDS | VMDHHFRKPANDITSQ | LEI----- | NFGDLGRPG----- | RGG                      |  |
| STM1   | YEAST |        | 173 | ELDAERIETA    | AEKEAYVPATKVKNVKS  | QQL-----         | KTKEYLE  | FDA            | TFVESNTRKNFNGDRNNNSRNNFN |  |
|        |       |        |     |               |                    |                  |          |                | NNRRGG                   |  |

|        |       |        |     |                         |                   |         |      |  |  |
|--------|-------|--------|-----|-------------------------|-------------------|---------|------|--|--|
| SERBP1 | X4    | RABBIT | 348 | RGGRGGRGRGRPNRGSRTDKSSA | SAPDV----         | DDPEAF  | PALA |  |  |
| SERBP1 | X1    | RABBIT | 369 | RGGRGGRGRGRPNRGSRTDKSSA | SAPDV----         | DDPEAF  | PALA |  |  |
| SERBP1 | X2    | RABBIT | 363 | RGGRGGRGRGRPNRGSRTDKSSA | SAPDV----         | DDPEAF  | PALA |  |  |
| SERBP1 | X3    | RABBIT | 354 | RGGRGGRGRGRPNRGSRTDKSSA | SAPDV----         | DDPEAF  | PALA |  |  |
| STM1   | YEAST |        | 240 | RGARKG-----             | NNTANATNSANTVQKNR | NIDVSNL | PSLA |  |  |
