# Supplementary material for: Structures of translationally inactive mammalian ribosomes
Source: eLife journal article supplement (doi:10.7554/elife.40486), 2018-10-24
Supplement: supp [file elife-40486-supp-v1.zip]

|                  |   |                                                                                                                        | α1 | α2 |
|------------------|---|------------------------------------------------------------------------------------------------------------------------|----|----|
| Rabbit IFRD2     | 1 | MPRARKGN-----TPRKGGQRRGGGARSSAQADSGSSEDEA-ASEARSTTSECPSLLSTTAEDSLGGDVT-DEQGPQEDLEEKLKEYVDGLTDRSAKTRQGALES              |    |    |
| Mouse IFRD2      | 1 | MPRARKGN-----ALRKGQGRRGGGARSSQTQADSGSSEDEA-ASEARSTTSDCPSSLSATTEDCLLGGEAV-DEQSQQENLEEKLKGVDCLTDRSAKTRQGALES             |    |    |
| Human IFRD2      | 1 | MPRARKGN-----TLRKGGQRRGGGARSSAQADSGSSDDEA-ASEARSTASECPSSLSTTAEDSLGGDVT-DEQGPQEDLEEKLKEYVDCLTDRSAKTRQGALES              |    |    |
| Xenopus IFRD2    | 1 | MPRARRGNQ-----SAKKGSGNR--GSRNGTRGDSEASEDEA-ASEVLSHCSSASSETVSVAAEAAA--GNEV-DYQAQQEERLDKLKEDIENVMKRSVKTRLAALGN           |    |    |
| Zebrafish IFRD2  | 1 | MPRNKKKG-----RGGNSSSK---GRNGVRGETGVSSDDIL-ASDVLSHYSS-ASESASVIEEG-AGEVV-DEQTAQEETEDPKLKQCIDNLMKDSAKTRLAALLES            |    |    |
| Xenopus IFRD1    | 1 | MPKPKRSN-----RAAGQHK-----NVQAFSDDDSD-SIETMSHCSS-FSDVASFAEDG---TEV-DEFAAQEDFQYKLKGLIDLTMKDSAKTRQAALEG                   |    |    |
| Zebrafish IFRD1  | 1 | MPKPKRSN-----GKGQQQG-----NVQFSDDEDA-SIETMSHCSS-LSERTSAAEEA---GET--EEMAEEDFQYKLKGLIYDSTVDRSAKTRQGAALDG                  |    |    |
| Mouse IFRD1      | 1 | MPKNKKRNAPHRRGGGGG---GSGGAATSAATAGGPHR-----TVQPFSDEDA-SIETMSHCSS-YSDPSSFAEDG---PEVLDEEGTQEDLEYKLGKGLIDLTMKDSAKTRQAALEG |    |    |
| Human IFRD1      | 1 | MPKNKKRNTPHRGSSAGGGGGSGAAAAATAATAGGQHR-----NVQPFSDEDA-SIETMSHCSS-YSDPSSFAEDG---PEVLDEEGTQEDLEYKLGKGLIDLTMKDSAKTRQAALEG |    |    |
| Rabbit IFRD1     | 1 | MPKNKKRNAPHRRGGSGGGGGSGAAAAATAATAGGQHR-----NVQPFSDEDA-SIETMSHCSS-YSDPSSFAEDG---PEVLDEEGSQEDLEYKLGKGLIDLTMKDSAKTRQAALEG |    |    |
| Drosophila IFRD1 | 1 | MPRRNKKS-----AAGRGR-----NDSNDEDE-SFDNVSVYSH-MSEVAS-----SEA-TDELANERFEKFEKALEQATEKSAQTRVQALQA                           |    |    |
| Drosophila IFRD2 | 1 | MPRRNKKS-----AAGRGR-----NDSNDEDE-SFDNVSVYSH-MSEVAS-----SEA-TDELANERFEKFEKALEQATEKSAQTRVQALQA                           |    |    |
| C.elegans IFRD1  | 1 | MGNKNRKN-----KDKDPYI-----GPAKTGRNDSDDSDSESSAYT-YNEDIQ-----SIM-GDVEDMNDVYDQLVDNLDRAQDKNSTRIDGLHR                        |    |    |
| C.elegans IFRD2  | 1 | MGNKNRKN-----KDKDPYI-----GPAKTGRNDSDDSDSESSAYT-YNEDIQ-----SIM-GDVEDMNDVYDQLVDNLDRAQDKNSTRIDGLHR                        |    |    |
| Consensus:       |   | Ms+s+p.s.....s.s.....ss...tcp..t..s..Sph.p..sp..p.....s.h.sr..sbpchb.pL...l..h.DKstpTRbstLp.                           |    |    |

|                  |     |                                                                                                                          | α3 | α4 | α5 | α6 | α7 |
|------------------|-----|--------------------------------------------------------------------------------------------------------------------------|----|----|----|----|----|
| Rabbit IFRD2     | 99  | LRLALASRLLPDFLLERRITLADALEKCLKKKGKEEQALAAAVLGLLCVQLGPGKGEELFHSLOPLLISVLSDSTASPAARLHCASALGLGCYVAAAD-VQDLVSLCLACLEGVFSRSCG |    |    |    |    |    |
| Mouse IFRD2      | 99  | LRLALASRLLPDFLLERSLTLADALEKCLKKKGKEEQALAAAVLGLLCVQLGPGKGEELFHSLOPLLISVLSDSTASPTARLHCASALGLGCYVAAAD-VQDLVSLCLACLEGVFSRSCG |    |    |    |    |    |
| Human IFRD2      | 99  | LRLALASRLLPDFLLERRITLADALEKCLKKKGKEEQALAAAVLGLLCVQLGPGKGEELFHSLOPLLISVLSDSTASPAARLHCASALGLGCYVAAAD-IQDLVSLCLACLEGVFSRSG  |    |    |    |    |    |
| Xenopus IFRD2    | 96  | LRLALSSQVLADFLLERRITLLEALERCLKKKGKEEQVAAIVLSLLSIQLGCGAEGEELFRVCVPIILINIVTDSSAGLSARQSCATCLGLCCYIAED-VEDLISTVCLEGIFTSCYS   |    |    |    |    |    |
| Zebrafish IFRD2  | 93  | LRMAFSSRVLYEFLLERRYTISDCLERSLKKKGEGEEQAAATVFALLCLLGGGVEGEEGFKMRPVLSTILIDSCASLAARQSCARALGCCCVIASADDELLKSLGHLESFVFGAYP     |    |    |    |    |    |
| Xenopus IFRD1    | 85  | LKTLGSSKILYDFISERRMTLTDIERCLKKKGSEEGQVAAALACCLLGGGIESEEVFRTVAPVLKTVCDRSANTQARQACATYLGCCFIATDD-VEDLYTLMCEMNLFTKQYH        |    |    |    |    |    |
| Zebrafish IFRD1  | 83  | LKTMATKILYDFISERRMTITDIERCLKKKGVEQSAASLACLLCIOLGSGIESEEVFKSLKPFVKTLINDGTANIQAQACATSLGLCTLVAEDD-IMDVYATMCFEFTKTSYI        |    |    |    |    |    |
| Mouse IFRD1      | 104 | LKALNSKVLVEFVLERRMTLTDIERCLKKKGSDQRAAAAVASVLCIOLGPGIESEELIKTLGLPILKKICDGSASMQARQTCATCFGVCCFIATDD-ITELYSTLECFENFTKSYL     |    |    |    |    |    |
| Human IFRD1      | 106 | IKNALASKMLYEFILERRMTLTDIERCLKKKGSDQRAAAALASVLCIOLGPGIESEELIKTLGLPILKKICDGSASMQARQTCATCFGVCCFIATDD-ITELYSTLECFENFTKSYL    |    |    |    |    |    |
| Rabbit IFRD1     | 106 | IKNALASKMLCEFILERRMTLTDIERCLKKKGSDQRAAAALASVLCIOLGPGIESEELIKTLGLPILKKICDGTASIQAQTCATCFGVCCFIATDD-ITELYSTLECFENFTKSYI     |    |    |    |    |    |
| Drosophila IFRD1 | 77  | ICELLMHRYMPDEFVDRKMTLMDFVEKSIIRKGQGEQVVGARLAPLLVLQMG---DEGISKAMNQFLNTVQDKSVGFADARAKCTAVGLLSFLGCD-VGELVLHMQSFEAIFAGSYL    |    |    |    |    |    |
| Drosophila IFRD2 | 77  | ICELLMHRYMPDEFVDRKMTLMDFVEKSIIRKGQGEQVVGARLAPLLVLQMG---DEGISKAMNQFLNTVQDKSVGFADARAKCTAVGLLSFLGCD-VGELVLHMQSFEAIFAGSYL    |    |    |    |    |    |
| C.elegans IFRD1  | 80  | VNLALTAKPAPEFINRNKETIMAVCSRMANKPDSEAQFL-ARLVGLVAVQAGE--EISEMIAEPMQSMRTILMDASRCVFLRTACATSLAIVTRIACSE-DEEVTANAKACRFWAHTKV  |    |    |    |    |    |
| C.elegans IFRD2  | 80  | VNLALTAKPAPEFINRNKETIMAVCSRMANKPDSEAQFL-ARLVGLVAVQAGE--EISEMIAEPMQSMRTILMDASRCVFLRTACATSLAIVTRIACSE-DEEVTANAKACRFWAHTKV  |    |    |    |    |    |
| Consensus:       |     | lp.tLss+.h..-Fl.cp+Thhshp+.hkKscp.Q.htA.lhtLltlQHG...c.pzhh...s.h.sll.D.o.th.hR..CAotltlhh.lthp...-lh.sh.thc.h@h.sb.     |    |    |    |    |    |

|                  |     |                                                                                                                         | α8 | α9 | α10 | α11 | α12 |
|------------------|-----|-------------------------------------------------------------------------------------------------------------------------|----|----|-----|-----|-----|
| Rabbit IFRD2     | 218 | -TGSSTSHV-APASLHGVCCALQAWALLTICPSAHISHILD-----RQLPRLPQLLSSESVNLRIAAGETIALLFELARDLEEDFVYEDMEALCSTRTLATDSNKYRAKADRRRQR    |    |    |     |     |     |
| Mouse IFRD2      | 218 | TSGSAASL--VPASLHGLLCAALQAWALLTICPGTHISHILD-----RQLPRLPQLLSSESVNLRIAAGETIALLFELARDLEEDFVYEDMEALCGLSRLTLATDSNKYRAKVDRRRQR |    |    |     |     |     |
| Human IFRD2      | 218 | LGGSSSTPV-VPASLHGLLSAALQAWALLTICPSTQISHILD-----RQLPRLPQLLSSESVNLRIAAGETIALLFELARDLEEFVYEDMEALCGLSRLTLATDSNKYRAKADRRRQR  |    |    |     |     |     |
| Xenopus IFRD2    | 215 | -NCSSPS----PALQGLLCAALQAWALLTICPATHVHKVLE-----SHLPQSLGISSESVSRLTAGENLALLHGLDLDFFYEDMESLCVTLKALATDSNKYRAKTRDRRQR         |    |    |     |     |     |
| Zebrafish IFRD2  | 213 | -LGDGSLPS-VKAGTIPALHSAALQAWALLTICLPASHINTILN-----HHLPRLHACLSESEVNFRVIAAGETIALLYELGRDIDQFEYEDDCALCDSLKLATDGNKHRAKNDRRQR  |    |    |     |     |     |
| Xenopus IFRD1    | 204 | -SEGG-----ADNCSALHIALQASWLLTICTHNSVEKKILN-----IHLRLKPLACEVNMRTIAGETIALLFELAREADAFYFEDLEPDLTKSLATDGNKHRAKTRDRRQR         |    |    |     |     |     |
| Zebrafish IFRD1  | 202 | -REDGSRPS-VSPPTVQLHTNALLSWALLTICTGSHIRAIQ-----KHLAKLPRLENDNVNMRTIAGETIALLFELIRDVEPEFDLDEWEPLCEKLNALATDCNKHRAKTRDKRQR    |    |    |     |     |     |
| Mouse IFRD1      | 223 | -KEKDTNVT-CSTPNTVLHISSSLAWLLLTICPINEVKKLE-----LHFHKLPSLLSCDDVMNRTIAGESLALLFELARGMESDFFYEDMDSLTQMLRALATDGNKHRAKVDKRRQR   |    |    |     |     |     |
| Human IFRD1      | 225 | -KEKDTTVI-CSTPNTVLHISSSLAWLLLTICPINEVKKLE-----LHFHKLPSLLSCDDVMNRTIAGESLALLFELARGMESDFFYEDMDSLTQMLRALATDGNKHRAKVDKRRQR   |    |    |     |     |     |
| Rabbit IFRD1     | 225 | -KEKDTNVL-CSTPSTVLHISSSLAWLLLTICPISEVKKLE-----MHFHKLPSSLSCDDVMNRTIAGESLALLFELARGIESDFFYEDMESLTQMLRALATDGNKHRAKVDKRRQR   |    |    |     |     |     |
| Drosophila IFRD1 | 193 | -RGDDTKTPSVTAEAGTFHAEALNAWGLLLTLIPSGDFVSLMTTGQNMFPFSIKKFLGLLQSTHLDVMAAGETIALLILESGRAHEEDFLEDDIALSEAVKQLATDSHKYRAKRDRAQR |    |    |     |     |     |
| Drosophila IFRD2 | 193 | -RGDDTKTPSVTAEAGTFHAEALNAWGLLLTLIPSGDFVSLMTTGQNMFPFSIKKFLGLLQSTHLDVMAAGETIALLILESGRAHEEDFLEDDIALSEAVKQLATDSHKYRAKRDRAQR |    |    |     |     |     |
| C.elegans IFRD1  | 196 | -SGSANDIG----HAKLVGTSLSFSWCVMLLDADFQITINDAV-----ADQPKIVTLSSNQLEVLRLAAETLAFHLEFMQDARGPFRFNKEHVLSSLDQMVNDSSKKKTKKDKRAQR   |    |    |     |     |     |
| C.elegans IFRD2  | 196 | -SGSANDIG----HAKLVGTSLSFSWCVMLLDADFQITINDAV-----ADQPKIVTLSSNQLEVLRLAAETLAFHLEFMQDARGPFRFNKEHVLSSLDQMVNDSSKKKTKKDKRAQR   |    |    |     |     |     |
| Consensus:       |     | .p.ssss...ss.h..lh..tLbWhlhLh.ts..plpp.hp.....pb.+l..LLtpplphrLAAEoLhL@Eh.pshc..F.h.sb-.lhp.Lc.hhsDtsK.+hK.D+R.QR       |    |    |     |     |     |

|                  |     |                                                                                                                          | β1 | β2 | α13 | α14 | α15 | α16 |
|------------------|-----|--------------------------------------------------------------------------------------------------------------------------|----|----|-----|-----|-----|-----|
| Rabbit IFRD2     | 330 | STFRAVLHYVEG-GECEETVRFGLLEVLYVDSWARHRYVTSFKEALGSLGHHHLQNNELLRIDIFGLGPVLVLD-ATALKACKISRFKEKHYLNAAAFKARTKARSVRDRKRAIDL---  |    |    |     |     |     |     |
| Mouse IFRD2      | 330 | SIFRAVLHFVEG-GECEETVRFGLLEVLYVDSWARHRYVTSFKEALGSLGHHHLQNNELLRIDIFGLGPVLVLD-AAALKACKISRFKEKHYLNAAAFKARTKARSVRDRKRAIDL---  |    |    |     |     |     |     |
| Human IFRD2      | 331 | STFRAVLHVEG-GECEEIVRFGLLEVLYVDSWARHRYVTSFKEALGSLGHHHLQNNELLRIDIFGLGPVLVLD-ATALKACKVPREFKEKHYLNAAAFKARTKARSVRDRKRAIDL---  |    |    |     |     |     |     |
| Xenopus IFRD2    | 323 | SIFRDVLHYIEN-GEFQENIKFGLLEVLYVDSWARRRYTNAPKEILGSGIRHHLQYNEVLRREILSLGPPVLVD-AATIKASKISRVEKHMFSNAAAFKARTKARNVRDRKRAIDV---  |    |    |     |     |     |     |
| Zebrafish IFRD2  | 325 | SIFREVLHYIEN-EDFTDEKIQFGLIEVIYIDGMWRRRIYDAFKEVLSGVRHHLQNNELLRIDIFGLGPPLLD-ASVKASKISRERHLFNSAFAFKARTKARNVRDRKRAIDV---     |    |    |     |     |     |     |
| Xenopus IFRD1    | 311 | SVFRDVLRAVEE-GDFQPEMIRFGRERHLDSDVWVKRLTYGTFKELFGSGMQFHLLTNVFLRSIFELGPPLLD-TATIKAMKVSREERHLLNSAFAFKARTKARKNRDRKRVDSGEFF   |    |    |     |     |     |     |
| Zebrafish IFRD1  | 314 | SVFRDVLKAVED-GDFQSETIRFGTERTMLIDSVWRKRTYDAFREVLGSGMNYHLQANEFIRDVDFELGPPLLD-SATLKAMKSRERHLLNSAFAFKARTKARKNRCDKRDVDGEFF    |    |    |     |     |     |     |
| Mouse IFRD1      | 335 | SVFRDVLRAVEE-RDPFTETVKFGPERMYIDSVWKHTYDTFKEVLGSGMQYHLLQTNEFLRNVPFELGPVMLD-AATLTKMTKISRFRERHLYNSAFAFKARTKARKNRCDKRDVGEFFL |    |    |     |     |     |     |
| Human IFRD1      | 337 | SVFRDVLRAVEE-RDPFTETVKFGPERMYIDCWVKHTYDTFKEVLGSGMQYHLLQSNFELRNVPFELGPVMLD-AATLTKMTKISRFRERHLYNSAFAFKARTKARKNRCDKRDVGEFF  |    |    |     |     |     |     |
| Rabbit IFRD1     | 337 | SVFRDVLRAVEE-RDPFTETVKFGPERMYIDSVWKHTYDTFKEVLGSGMQYHLLQSNFELRNVPFELGPVMLD-AATLTKMTKISRFRERHLYNSAFAFKARTKARKNRCDKRDVGEFF  |    |    |     |     |     |     |
| Drosophila IFRD1 | 312 | ATFRDVLRYLEE-DISPESIRFQTESLTLDSWSIHQYSAMCTVMGPGMTSOLQENEFIRDFIQGLPRPTNTGINGNAKVPTKLERHLYLNAAAFKARSITRGKNDRKRSVAVT--      |    |    |     |     |     |     |
| Drosophila IFRD2 | 312 | ATFRDVLRYLEE-DISPESIRFQTESLTLDSWSIHQYSAMCTVMGPGMTSOLQENEFIRDFIQGLPRPTNTGINGNAKVPTKLERHLYLNAAAFKARSITRGKNDRKRSVAVT--      |    |    |     |     |     |     |
| C.elegans IFRD1  | 303 | YAVRDIRAFIATEDDEDAPEVNVKIQQOTLSLSDCAIKIFYDTTCDLLHGGLAQQLLHNEVLRDVFGLPIALEP-----AESANKQSRSLAVHEAADKHRNQVRGKQDKRSTVY---    |    |    |     |     |     |     |
| C.elegans IFRD2  | 303 | YAVRDIRAFIATEDDEDAPEVNVKIQQOTLSLSDCAIKIFYDTTCDLLHGGLAQQLLHNEVLRDVFGLPIALEP-----AESANKQSRSLAVHEAADKHRNQVRGKQDKRSTVY---    |    |    |     |     |     |     |
| Consensus:       |     | .hR-1..h.l.p.--h.p.s+hG.p.h.JDShh..f.hYshh..-lh.TGh..pLb.NEhRslF.LGP.hhbs..ss..h.p.s+bp+hphp.AA.KhRspRs+.RDRKtsV....     |    |    |     |     |     |     |
