# Supplementary material for: Structures of translationally inactive mammalian ribosomes
Source: eLife. 2018 Oct 24;7:e40486. doi: 10.7554/eLife.40486 (PMC6226290; doi:10.7554/eLife.40486)
Supplement: Supplementary file 1. — For clarity, ribosomal proteins and contaminating bacterial and skin proteins are excluded and known components of multisubunit complexes clustered at the end of the table. Sample A represents the sample used for cryo-EM. Sample B are the proteins eluted from ribosomes under physiological salt conditions. Sample C are the proteins eluted from ribosomes under high-salt (750 mM KOAc, 15 mM Mg(OAc)2) conditions. Proteins observed in cryo-EM complexes are highlighted in yellow. [file elife-40486-supp1.xlsx]

## Sheet: Sheet1
Sample	Protein	Rabbit ID	Human ID	MW	Reported function
				(kDa)
A only (16 proteins)
	Ski8	G1SWE5_RABIT	WDR61_HUMAN	33.6	Component of the SKI complex, involved in exosome-mediated RNA decay
	Developmentally regulated GTP binding protein 1	B7NZM4_RABIT	DRG1_HUMAN	40.5	Belongs to ribosome-binding Obg GTPase subfamily
	Elongation factor 1-alpha	EF1A1_RABIT	EF1A1_HUMAN	50.2	Translational elongation
	Probable ATP-dependent RNA helicase DDX6	G1SPT2_RABIT	DDX6_HUMAN	53.2	ATP-dependent RNA helicase. Associates with YBX1.
	Interferon-induced protein with tetratricopeptide repeats 3	U3KNF6_RABIT	IFIT3_HUMAN	54.8	Interferon-induced protein
	tRNA-splicing ligase RtcB homolog	G1SUU7_RABIT	RTCB_HUMAN	55.2	Catalytic subunit of the tRNA-splicing ligase complex
	Interferon related developmental regulator 2	G1SHD9_RABIT	IFRD2_HUMAN	55.5	Interferon-related developmental regulator
	FMR1 autosomal homolog 1	G1U797_RABIT	FXR1_HUMAN	76.3	Polyribosome-associated RNA-binding protein. Homolog of FMR1.
	ATP-dependent RNA helicase DDX3X isoform X1	G1T336_RABIT	DDX3X_HUMAN	81.1	ATP-dependent RNA helicase. May assiociate with PABP1 and caprin-1.
	ATP-dependent 6-phosphofructokinase	G1TDQ5_RABIT	K6PL_HUMAN	85	Enzyme. Catalyzes the first committing step of glycolysis
	Regulator of nonsense transcripts 1 (UPF1)	G1SSA0_RABIT	RENT1_HUMAN	124.3	RNA-dependent helicase. Nonsense mediated decay
	DExH-box helicase 9	G1TGK9_RABIT	DHX9_HUMAN	129.7	ATP-dependent helicase
	DExH-box helicase 30	G1SR61_RABIT	DHX30_HUMAN	135.9	ATP-dependent RNA helicase
	Tripeptidyl peptidase 2	G1T748_RABIT	TPP2_HUMAN	146.9	Peptidase
	ATP-dependent RNA helicase DHX29	G1U383_RABIT	DHX29_HUMAN	148.8	ATP-dependent RNA helicase
	GRB10 interacting GYF protein 2	G1SGK1_RABIT	GGYF2_HUMAN	151	Component of the 4EHP-GYF2 complex; represses initiation of translation
A and B or C (31 proteins)
	Sec61 subunit beta	G1U637_RABIT	SC61B_HUMAN	10	In vitro synthesized substrate
	Hemoglobin subunit beta	HBB_RABIT	HBB_HUMAN	16.1	Oxygen transport
	Nascent polypeptide-associated complex subunit alpha	XP_008254905	NACA_HUMAN	21.5	Prevents inappropriate targeting of non-secretory polypeptides to the endoplasmic reticulum
	Nascent polypeptide-associated complex subunit beta	U3KMX6_RABIT	BTF3_HUMAN	22.1	Prevents inappropriate targeting of non-secretory polypeptides to the endoplasmic reticulum
	Eukaryotic translation initiation factor 6	B7NZI5_RABIT	IF6_HUMAN	26.6	Anti-association factor
	Nuclease-sensitive element-binding protein 1	YBOX1_RABIT	YBOX1_HUMAN	35.9	Mediates pre-mRNA alternative splicing regulation
	Pelota	G1TVY8_RABIT	PELO_HUMAN	43.4	Ribosome rescue
	Proliferation-associated protein 2G4	G1TDI0_RABIT	PA2G4_HUMAN	43.5	Ribosome biogenesis factor. Binds at ribosomal exit tunnel.
	SERPINE1 mRNA binding protein 1 (SERBP1)	G1SW77_RABIT	PAIRB_HUMAN	44.8	Stm1-like factor.
	Bactericidal permeability-increasing protein	BPI_RABIT	BPI_HUMAN	48.8	Cytotoxic to Gram-negative bacteria
	eRF1	ERF1_RABIT	ERF1_HUMAN	49	Translational termination
	Ras GTPase-activating protein-binding protein 1 (G3BP1)	G1U118_RABIT	G3BP1_HUMAN	49.9	ATP-dependent DNA helicase. May form complex with CAPR1 and FMR1
	Interferon-induced protein with tetratricopeptide repeats 1B	G1SNY1_RABIT	IFT1B_HUMAN	55.4	Interferon-induced protein
	Protein SLFN14	G1SRW8_RABIT	SLN14_HUMAN	58.1	Possible ribosome-associated endoribonuclease
	DnaJ heat shock protein family (Hsp40) member C21	G1SNJ2_RABIT	DJC21_HUMAN	61.9	Chaperone
	ABCE1	G1SG72_RABIT	ABCE1_HUMAN	67.3	Translational termination
	Serum albumin	ALBU_RABIT	ALBU_HUMAN	69.4	Maintaining oncotic pressure in blood plasma
	Polyadenylate-binding protein	G1SLM0_RABIT	PABP1_HUMAN	70.6	Binds the poly(A) tail of mRNA
	Fragile X mental retardation 1	G1T7S6_RABIT	FMR1_HUMAN	71.2	Polyribosome-associated RNA-binding protein
	Heat shock cognate 71 kDa protein	G1T9M9_RABIT	HSP7C_HUMAN	71.2	Chaperone
	Arachidonate 15-lipoxygenase	LOX15_RABIT	LOX15_HUMAN	75.2	Non-heme iron-containing dioxygenase
	Caprin-1	G1U636_RABIT	CAPR1_HUMAN	78.3	May form complex with G3BP-1 and FMR1
	ATP-dependent RNA helicase DDX1	G1SS73_RABIT	DDX1_HUMAN	82.4	ATP-dependent RNA helicase
	eEF2	EF2_RABIT	EF2_HUMAN	95.4	Translational elongation
	Protein argonaute-2	AGO2_RABIT	AGO2_HUMAN	97.4	Endonucleolytic cleavage
	DNA-binding protein SMUBP-2	G1TSN3_RABIT	SMBP2_HUMAN	108	ATP-dependent helicase
	La-related protein 1	G1T4N4_RABIT	LARP1_HUMAN	122	RNA-binding protein. Substrate of mTORC1. Regulates translation of specific mRNAs.
	NEMF	G1TDL5_RABIT	NEMF_HUMAN	123.1	Component of the ribosome quality control complex
	Ski2	G1SS77_RABIT	SKIV2_HUMAN	137.6	Component of the SKI complex, involved in exosome-mediated RNA decay
	Ski3	G1T057_RABIT	TTC37_HUMAN	174.7	Component of the SKI complex, involved in exosome-mediated RNA decay
	Listerin E3 ubiquitin protein ligase 1	G1T2N2_RABIT	LTN1_HUMAN	200.2	Component of the ribosome quality control complex
B only (4 proteins)
	UPF0587 protein C1orf123	G1T461_RABIT	CA123_HUMAN	18.1	Protein of unknown function
	PITH domain-containing protein 1	G1T5V2_RABIT	PITH1_HUMAN	24.2	Protein of unknown function
	Glyceraldehyde-3-phosphate dehydrogenase (GAPDH)	G3P_RABIT	G3P_HUMAN	36.1	Enzyme. Glucose metabolism.
	Serine/threonine-protein kinase mTOR	G1T4N5_RABIT	MTOR_HUMAN	288.9	Kinase. Regulates protein synthesis
B and/or C only (40 proteins)
	Protein S100-A8	G1SXG6_RABIT	S10A8_HUMAN	10.8	Calcium-binding protein
	Protein S100-A14	G1SI77_RABIT	S10AE_HUMAN	11.7	Calcium-binding protein
	Thioredoxin	THIO_RABIT	THIO_HUMAN	11.8	Enzyme. Detoxification of Reactive Oxygen Species
	Ubiquitin	UBIQ_RABIT	UBC_HUMAN	14.7	Regulatory protein. Marker for degradation
	Hemoglobin subunit alpha	HBA_RABIT	HBA_HUMAN	15.6	Oxygen transport
	Myoglobin	MYG_RABIT	MYG_HUMAN	17.1	Oxygen transport
	Protein/nucleic acid deglycase DJ-1	G1TBS1_RABIT	PARK7_HUMAN	20	Multifunctional protein
	Peroxiredoxin-1	G1SQ02_RABIT	PRDX1_HUMAN	21.8	Enzyme. Detoxification of Reactive Oxygen Species
	Ras-related protein Rab-11B	XP_017193461	RB11B_HUMAN	23	Small GTPase
	14-3-3 protein eta	B7NZM8_RABIT	1433F_HUMAN	28.2	Multifunctional protein
	Uroporphyrinogen-III synthase	G1SM21_RABIT	HEM4_HUMAN	28.4	Enzyme. Heme biosynthesis
	14-3-3 protein epsilon	G1T7R2_RABIT	1433E_HUMAN	29.2	Multifunctional protein
	Carbonic anhydrase 2	CAH2_RABIT	CAH2_HUMAN	29.5	Enzyme. Interconversion of carbon dioxide and water to bicarbonate
	Glutamate-cysteine ligase modifier subunit	G1T647_RABIT	GSH0_HUMAN	30.4	Enzyme. Synthesizes glutathione from L-cysteine and L-glutamate
	Hydroxyacylglutathione hydrolase, mitochondrial	XP_008251320	GLO2_HUMAN	34.1	Enzyme. Catalyzes the hydrolysis of S-D-lactoyl-glutathione.
	Ribose-phosphate pyrophosphokinase	G1T373_RABIT	PRPS1_HUMAN	34.8	Enzyme. Catalyzes the synthesis of phosphoribosylpyrophosphate
	Methylosome protein 50	G1STU0_RABIT	MEP50_HUMAN	36.7	Component of the methylosome
	Annexin A2	G1SL62_RABIT	ANXA2_HUMAN	38.5	Multifunctional protein
	Annexin A1	ANXA1_RABIT	ANXA1_HUMAN	38.7	Multifunctional protein
	Hsc70-interacting protein	G1SXL3_RABIT	F10A1_HUMAN	41.3	Chaperone
	Cathepsin D	G1TUA3_RABIT	CATD_HUMAN	44.6	Protease
	Elongation factor 1-gamma	EF1G_RABIT	EF1G_HUMAN	50	Translational elongation
	Serine/threonine-protein kinase 38	G1TPU5_RABIT	STK38_HUMAN	54.2	Kinase, activated by S100B
	Double-stranded RNA-binding protein Staufen homolog 1	G1SQK0_RABIT	STAU1_HUMAN	56.2	mRNA decay
	Catalase	G1T6W7_RABIT	CATA_HUMAN	59.9	Decomposition of hydrogen peroxide
	Stress induced phosphoprotein 1	G1TAF8_RABIT	STIP1_HUMAN	62.5	Chaperone
	Ran-binding protein 10	G1TU03_RABIT	RBP10_HUMAN	67.2	Guanine nucleotide exchange factor
	Protein arginine N-methyltransferase 5	G1SGM2_RABIT	ANM5_HUMAN	72.6	Arginine methyltransferase. PRMTs methylate SERBP1.
	Heat Shock Protein 70	G1SUX8_RABIT	Q59EJ3_HUMAN	73.3	Chaperone
	HBS1 like translational GTPase	G1T1M9_RABIT	HBS1L_HUMAN	75.1	Ribosome rescue
	Heat shock protein 90-beta	HS90B_RABIT	HS90B_HUMAN	83.2	Chaperone
	Heat shock protein 90-alpha	HS90A_RABIT	HS90A_HUMAN	84.7	Chaperone
	Transitional endoplasmic reticulum ATPase	G1SR03_RABIT	TERA_HUMAN	89.3	Multifunctional protein
	Importin subunit beta-1	G1T9F3_RABIT	IMB1_HUMAN	97.2	Nuclear protein import
	Phosphorylase	PYGM_RABIT	PYGM_HUMAN	97.3	Glycogen breakdown
	Importin-7	G1SSC9_RABIT	IPO7_HUMAN	119.5	Nuclear protein import
	DNA damage-binding protein 1	G1SFV7_RABIT	DDB1_HUMAN	126.9	DNA repair
	Ubiquitin conjugating enzyme E2 O	G1U3G0_RABIT	UBE2O_HUMAN	140.5	Ubiquitinates ribosomal proteins
	ATP-dependent RNA helicase A (DHX9)	G1TGK9_RABIT	DHX9_HUMAN	141.9	NTP-dependent helicase
	Clathrin heavy chain 1	G1TBL6_RABIT	CLH1_HUMAN	191.6	Protein of the polyhedral coat of coated pits and vesicles
	Initiation factors (16 factors)	G1T2G4_RABIT (IF2A_HUMAN; eIF2a), IF2B_RABIT (IF2B_HUMAN; eIF2b), G1SRA8_RABIT (IF2G_HUMAN; eIF2g), G1SMZ5_RABIT (EIF3A_HUMAN), G1SZ03_RABIT (EIF3B_HUMAN), G1U971_RABIT (EIF3C_HUMAN), G1SQV5_RABIT (EIF3D_HUMAN), G1SUC8_RABIT (EIF3E_HUMAN), G1SLC2_RABIT (EIF3F_HUMAN), EIF3G_HUMAN, G1ST95_RABIT (EIF3H_HUMAN), EIF3I_RABIT (EIF3I_HUMAN), G1SED9_RABIT (EIF3L_HUMAN), G1SLW8_RABIT (EIF3M_HUMAN), IF4A1_R…
	tRNA synthetases (8 factors)	SYFA_HUMAN, G1STW7_RABIT (SYFB_HUMAN), G1T846_RABIT (SYDC_HUMAN), G1TA11_RABIT (SYRC_HUMAN), G1SN68_RABIT (SYQ_HUMAN), G1TA15_RABIT (SYLC_HUMAN), G1T2I4_RABIT (SYEP_HUMAN), G1TKC4_RABIT (SYK_HUMAN)
	Proteasome subunits (23 subunits)	G1SDA8_RABIT (PSA1_HUMAN), G1T2L1_RABIT (PSA2_HUMAN), G1SZ14_RABIT (PSA3_HUMAN), G1T519_RABIT (PSA4_HUMAN), G1T670_RABIT (PSA5_HUMAN), G1T9V4_RABIT (PSA6_HUMAN), G1SKW5_RABIT (PSA7_HUMAN), G1T4X8_RABIT (PSB2_HUMAN), G1SHV9_RABIT (PSB3_HUMAN), G1T918_RABIT (PSB4_HUMAN), G1T4Q9_RABIT (PSB5_HUMAN), G1T235_RABIT (PSB6_HUMAN), G1SWK8_RABIT (PSB7_HUMAN), G1TLQ8_RABIT (PRS6A_HUMAN), G1SYV0_RABIT (PRS7_H…
	TriC chaperone (7 subunits)	B2ZDY6_RABIT (TCPA_HUMAN), B6V9S9_RABIT (TCPB_HUMAN), G1U9T8_RABIT (TCPD_HUMAN), G1TMS5_RABIT (TCPE_HUMAN), G1SCN8_RABIT (TCPG_HUMAN), B6V9S8_RABIT (TCPH_HUMAN), G1SHZ8_RABIT (TCPQ_HUMAN)
	Exosome (3 subunits)	EXOS6_HUMAN, G1SSF0_RABIT (EXOS2_HUMAN), G1SIX5_RABIT (EXOS9_HUMAN)
