# Supplementary figures and images for: Structures of translationally inactive mammalian ribosomes
Source: eLife journal article supplement (doi:10.7554/elife.40486), 2018-10-24

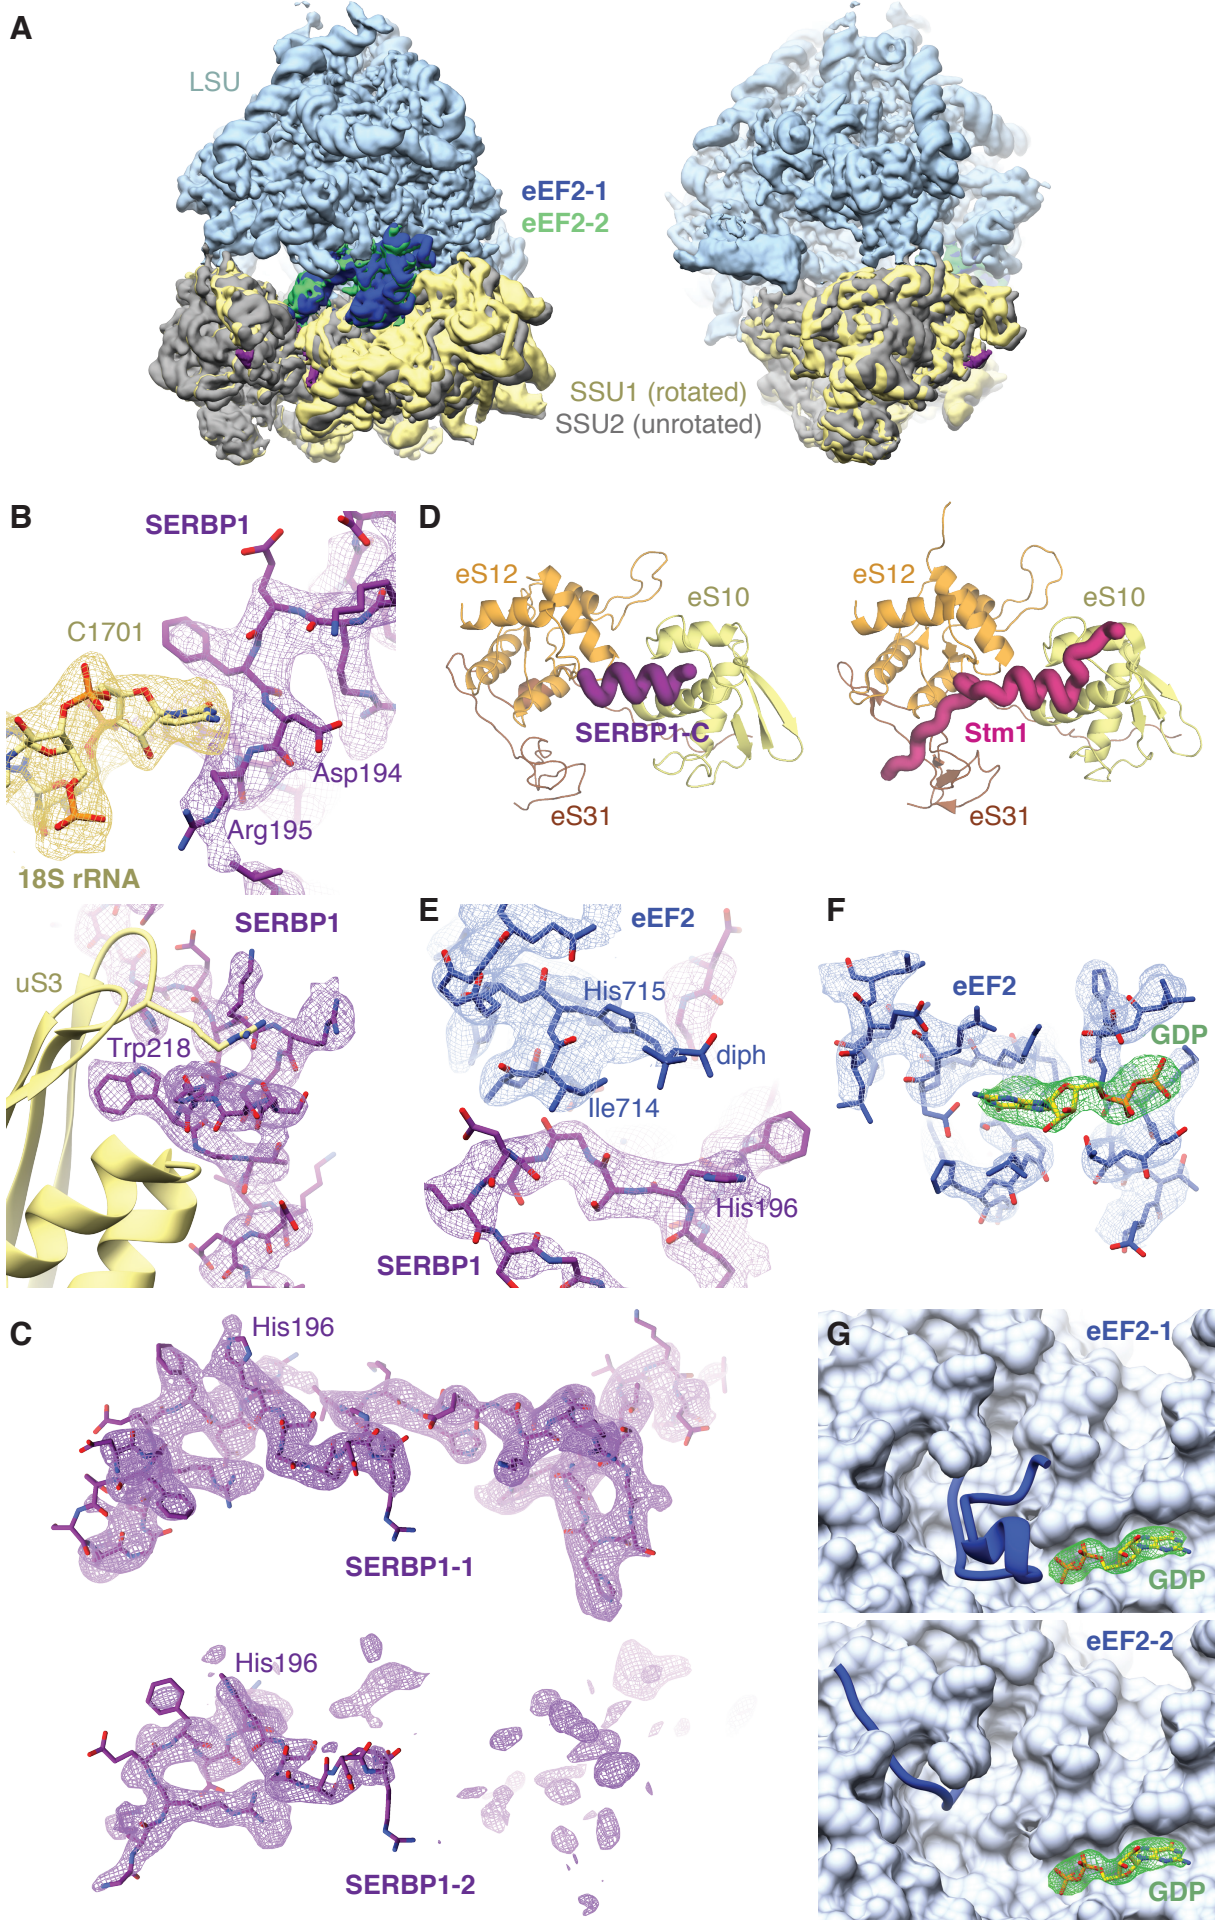

Supplement: supp [file elife-40486-supp-v1.zip]

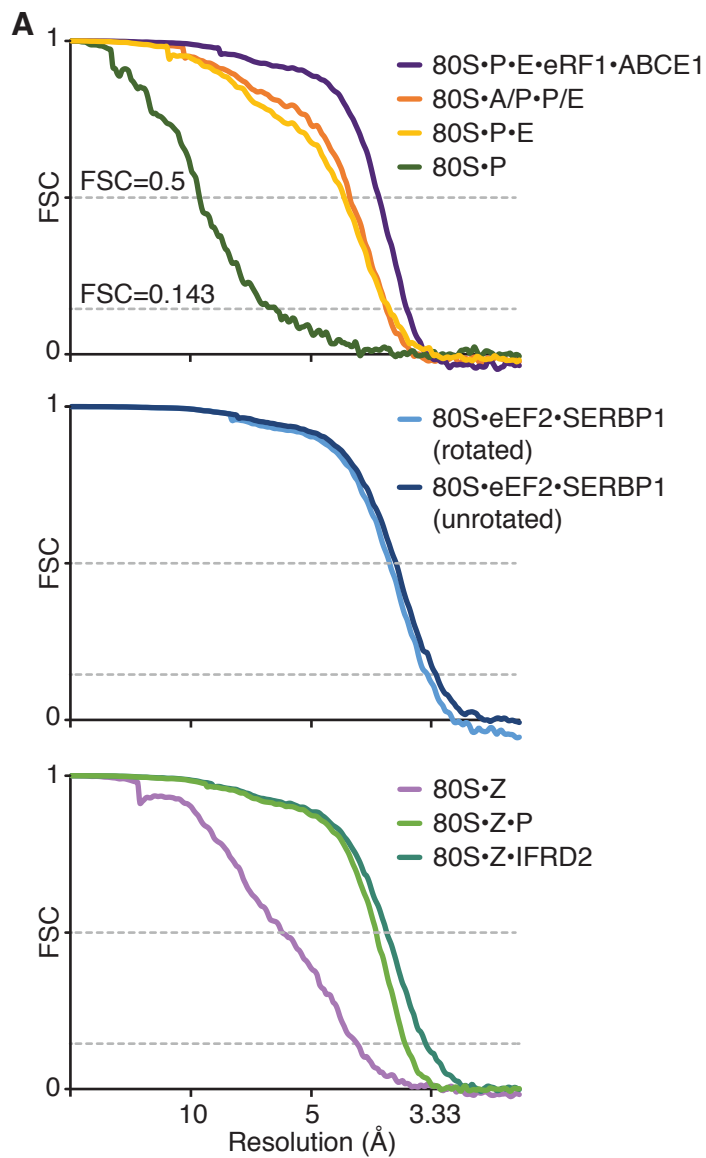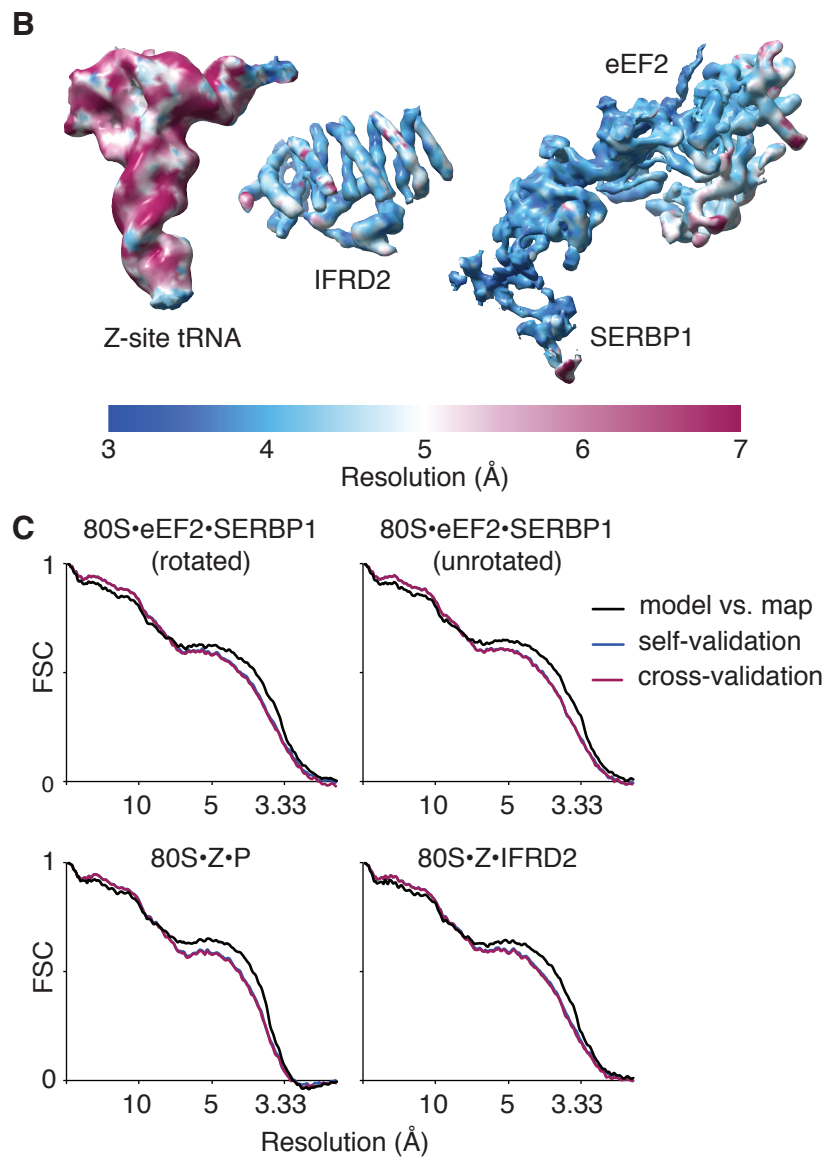

Supplement: supp [file elife-40486-supp-v1.zip]

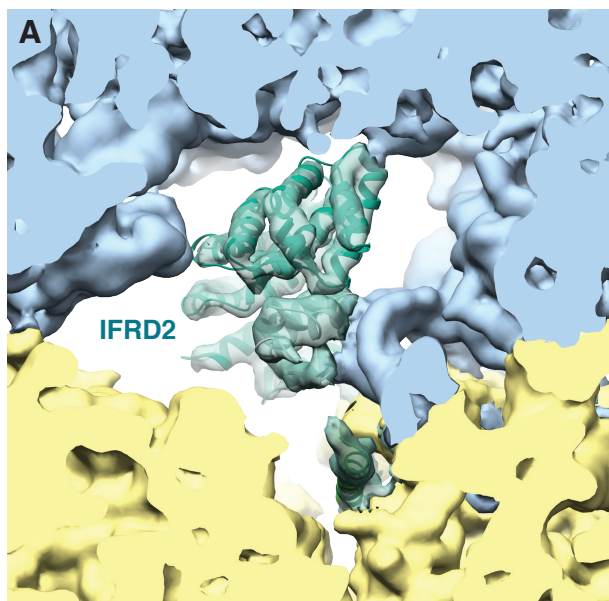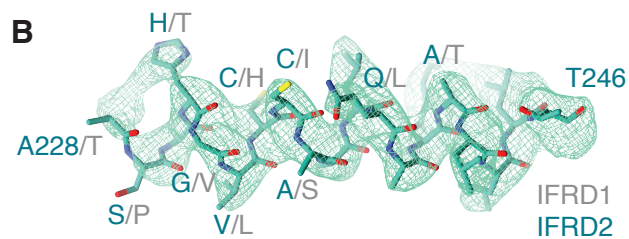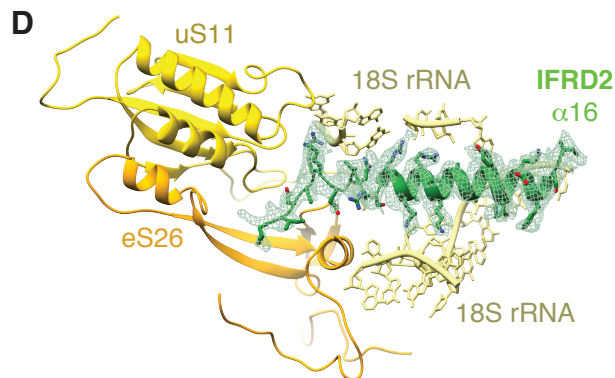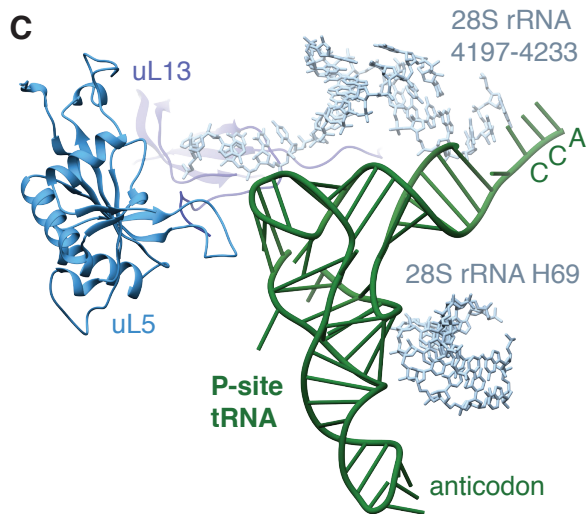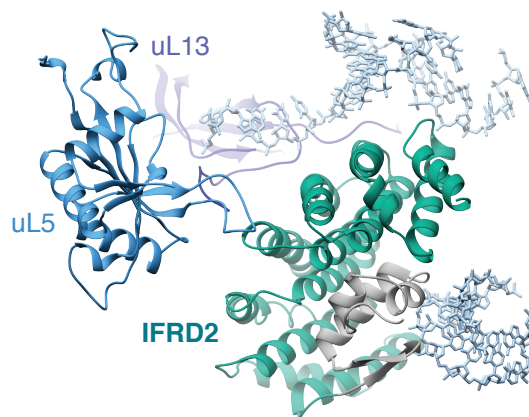

Supplement: supp [file elife-40486-supp-v1.zip]

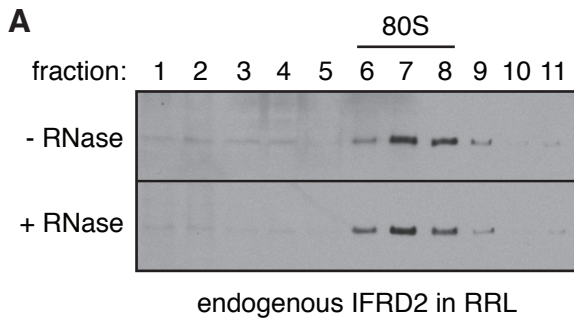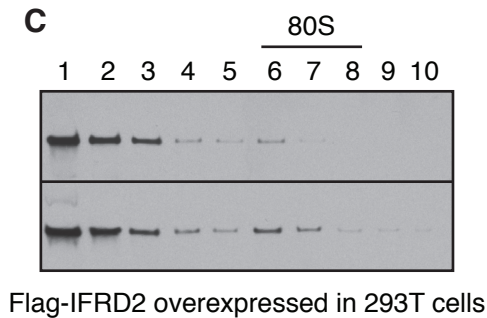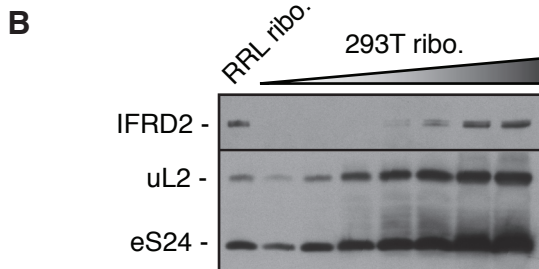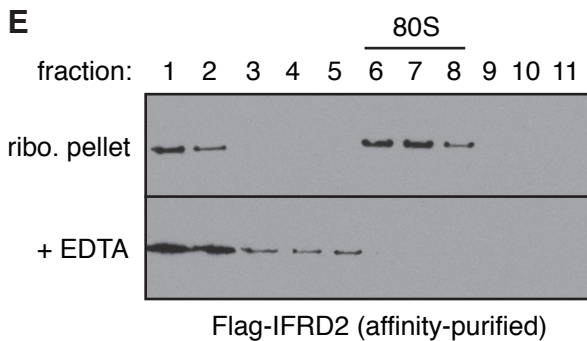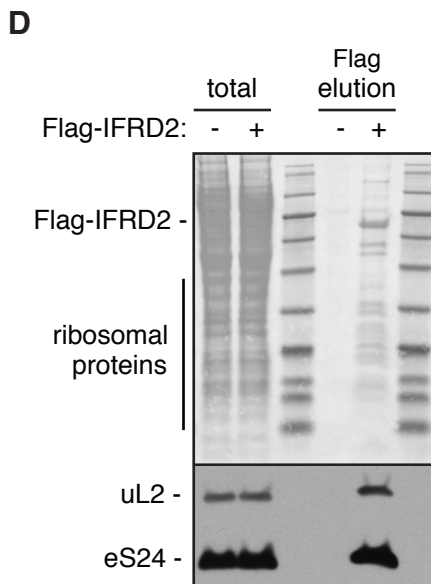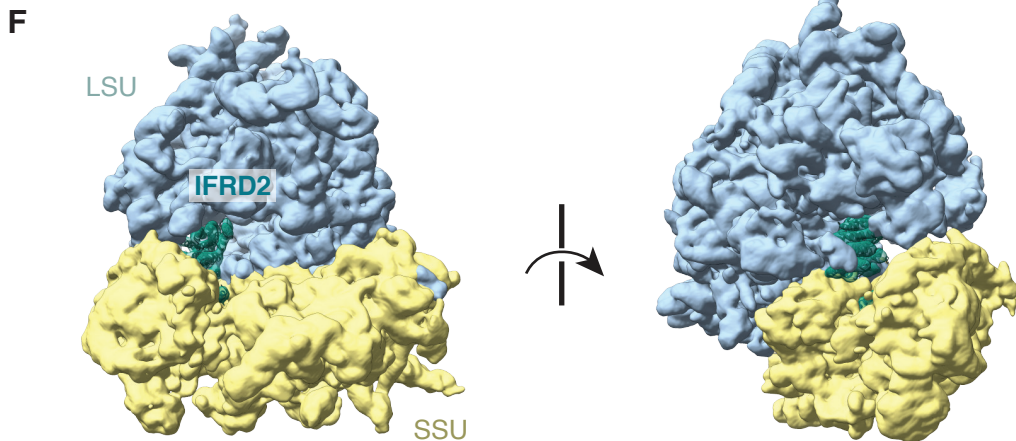

Supplement: supp [file elife-40486-supp-v1.zip]
